# Supplementary material for: Statistical Approach of Gene Set Analysis with Quantitative Trait Loci for Crop Gene Expression Studies
Source: Entropy (Basel). 2021 Jul 23;23(8):945. doi: 10.3390/e23080945 (PMC8391627; doi:10.3390/e23080945)
Supplement: Supplementary file 1 [file entropy-23-00945-s001.zip › entropy-1275912-supplementary/Table S1.xlsx]

## Sheet: Table S2
Table S2. Description about the gene expression studies used in this study (.xlxs).
	Rice Cold Stress							Rice Drought Stress							Rice Fungal (blast) Stress								Rice Insect (Brown Plant Hopper) Stress
	Serial No.	Series	Title	Organism	Variety	Growth stage		Serial	Series	Title	Organism	Variety	Sample tissue		Serial	Series	Title	Organism	Variety	Sample tissue			Serial	Series	Title	Rice Genotype	Tissue type
	1	GSE31077	Expression data from rice seeds during low temperature treatment	Oryza sativa	Zhonghua11 and Hanfeng	Seed		1	GSE6901	Expression data for stress treatment in rice seedlings	Oryza sativa, Indica Sp	IR64	Seedling		1	GSE41798	Transcriptome study of rice early response to rice blast fungus	Oryza sativa	IR18	Leaf			1	GSE29967	Expression data from rice after brown planthopper attack	Oryza sativa, Variety:RHT and TN1 variety	Stem
	2	GSE33204	DNA microarray data from transgenic rice Huahui 1 (HH1) and its parent Minghui 63 (MH63)	Oryza sativa	HH1 and MH63	Developmental stage		2	GSE26280	Genome-wide temporal-spatial gene expression profiling of drought responsiveness in rice	Oryza sativa, Indica Sp	IR64	Roots and Leaves		2	GSE7256	Identification of rice genes differentially expressed upon virulent infection by Magnaporthe grisea	Oryza sativa	Nipponbare	Seedlings
	3	GSE37940	Genome-wide Gene Expression Profiling Associated with Seedling Cold Tolerance Improvement in Japonica Rice Background	Oryza sativa	K354, C418	Seedling		3	GSE21651	Differential expression for salt and drought stress	Oryza sativa, Indica Sp		Leaves
	4	GSE6901	Expression data for stress treatment in rice seedlings	Oryza sativa, Indica Sp	IR64	Seedling		4	GSE23211	Expression data from PSARK::IPT and wildtype rice plants	Oryza sativa, Indica Sp		flag leaf
								5	GSE24048	Expression data from field droughted rice plants	Oryza sativa, Indica Sp	Bala and Azucena	Leaf
		Rice Cold Stress							Rice Drought Stress							Rice Fungal Stress							Rice Insect Stress
		GEO series	GEO Samples	Description	Target type	Sample labels			GEO series	GEO Samples	Description	Target type	Sample labels			GEO series	GEO Samples	Description	Target type	Sample labels			GEO series	GEO Samples	Description	Target type	Sample labels
		GSE31077	GSM769646	Hanfeng_4D_2DC, biological rep1	Stress	1			GSE6901	GSM159259	7-day-old Seedling, biological rep 1	Control	-1			GSE41798	GSM1024446_IR18.treat.rep1.CEL	IR18 treat rep1	Stress	1			GSE29967	GSM741672_RHT_T0-1.CEL	RHT stem at T0, biological rep1	Control	-1
		GSE31077	GSM769647	Hanfeng_4D_2DC, biological rep2	Stress	1			GSE6901	GSM159260	7-day-old Seedling, biological rep 2	Control	-1			GSE41798	GSM1024447_IR18.treat.rep2.CEL	IR18 treat rep2	Stress	1			GSE29967	GSM741673_RHT_T0-2.CEL	RHT stem at T0, biological rep2	Control	-1
		GSE31077	GSM769648	Hanfeng_4D, biological rep1	Control	-1			GSE6901	GSM159261	7-day-old Seedling, biological rep 3	Control	-1			GSE41798	GSM1024448_IR18.treat.rep3.CEL	IR18 treat rep3	Stress	1			GSE29967	GSM741674_RHT_T0-3.CEL	RHT stem at T0, biological rep3	Control	-1
		GSE31077	GSM769649	Hanfeng_4D, biological rep2	Control	-1			GSE6901	GSM159262	Drought stress, biological rep 1	Stress	1			GSE41798	GSM1024449_IR18.mock.rep1.CEL	IR18 mock rep1	Control	-1			GSE29967	GSM741675_RHT_T8-1.CEL	RHT stem at T8, biological rep1	Stress	1
		GSE31077	GSM769650	Zhonghua_10D_2DC, biological rep1	Stress	1			GSE6901	GSM159263	Drought stress, biological rep 2	Stress	1			GSE41798	GSM1024450_IR18.mock.rep2.CEL	IR18 mock rep2	Control	-1			GSE29967	GSM741676_RHT_T8-2.CEL	RHT stem at T8, biological rep2	Stress	1
		GSE31077	GSM769651	Zhonghua_10D_2DC, biological rep2	Stress	1			GSE6901	GSM159264	Drought stress, biological rep 3	Stress	1			GSE41798	GSM1024451_IR18.mock.rep3.CEL	IR18 mock rep3	Control	-1			GSE29967	GSM741677_RHT_T8-3.CEL	RHT stem at T8, biological rep3	Stress	1
		GSE31077	GSM769652	Zhonghua_10D, biological rep1	Control	-1			GSE26280	GSM645328	normal roots at tillering stage, biological rep1	Control	-1			GSE41798	GSM1024452_IR22.treat.rep1.CEL	IR22 treat rep1	Stress	1			GSE29967	GSM741678_RHT_T24-1.CEL	RHT stem at T24, biological rep1	Stress	1
		GSE31077	GSM769653	Zhonghua_10D, biological rep2	Control	-1			GSE26280	GSM645329	normal roots at tillering stage, biological rep2	Control	-1			GSE41798	GSM1024453_IR22.treat.rep2.CEL	IR22 treat rep2	Stress	1			GSE29967	GSM741679_RHT_T24-2.CEL	RHT stem at T24, biological rep2	Stress	1
		GSE31077	GSM769654	Zhonghua_12D, biological rep1	Control	-1			GSE26280	GSM645330	normal roots at tillering stage, biological rep3	Control	-1			GSE41798	GSM1024454_IR22.treat.rep3.CEL	IR22 treat rep3	Stress	1			GSE29967	GSM741680_RHT_T24-3.CEL	RHT stem at T24, biological rep3	Stress	1
		GSE31077	GSM769655	Zhonghua_12D, biological rep2	Control	-1			GSE26280	GSM645331	Drought treated roots at tillering stage, biological rep1	Stress	1			GSE41798	GSM1024455_IR22.mock.rep1.CEL	IR22 mock rep1	Control	-1			GSE29967	GSM741681_TN1_T0-1.CEL	TN1 stem at T0, biological rep1	Control	-1
		GSE31077	GSM769656	Zhonghua_4D_2DC, biological rep1	Stress	1			GSE26280	GSM645332	Drought treated roots at tillering stage, biological rep2	Stress	1			GSE41798	GSM1024456_IR22.mock.rep2.CEL	IR22 mock rep2	Control	-1			GSE29967	GSM741682_TN1_T0-2.CEL	TN1 stem at T0, biological rep2	Control	-1
		GSE31077	GSM769657	Zhonghua_4D_2DC, biological rep2	Stress	1			GSE26280	GSM645333	Drought treated roots at tillering stage, biological rep3	Stress	1			GSE41798	GSM1024457_IR22.mock.rep3.CEL	IR22 mock rep3	Control	-1			GSE29967	GSM741683_TN1_T0-3.CEL	TN1 stem at T0, biological rep3	Control	-1
		GSE31077	GSM769658	Zhonghua_4D, biological rep1	Control	-1			GSE26280	GSM645340	normal roots at panicle elongation stage, biological rep1	Control	-1			GSE41798	GSM1024458_LTH.treat.rep1.CEL	LTH treat rep1	Stress	1			GSE29967	GSM741684_TN1_T8-1.CEL	TN1 stem at T8, biological rep1	Stress	1
		GSE31077	GSM769659	Zhonghua_4D, biological rep2	Control	-1			GSE26280	GSM645341	normal roots at panicle elongation stage, biological rep2	Control	-1			GSE41798	GSM1024459_LTH.treat.rep2.CEL	LTH treat rep2	Stress	1			GSE29967	GSM741685_TN1_T8-2.CEL	TN1 stem at T8, biological rep2	Stress	1
		GSE31077	GSM769660	Zhonghua_6D, biological rep1	Control	-1			GSE26280	GSM645342	normal roots at panicle elongation stage, biological rep3	Control	-1			GSE41798	GSM1024460_LTH.treat.rep3.CEL	LTH treat rep3	Stress	1			GSE29967	GSM741686_TN1_T8-3.CEL	TN1 stem at T8, biological rep3	Stress	1
		GSE31077	GSM769661	Zhonghua_6D, biological rep2	Control	-1			GSE26280	GSM645343	Drought treated roots at panicle elongation stage, biological rep1	Stress	1			GSE41798	GSM1024461_LTH.mock.rep1.CEL	LTH mock rep1	Control	-1			GSE29967	GSM741687_TN1_T24-1.CEL	TN1 stem at T24, biological rep1	Stress	1
		GSE33204	GSM822100	HH1-LT, biological replicate 1	Stress	1			GSE26280	GSM645344	Drought treated roots at panicle elongation stage, biological rep2	Stress	1			GSE41798	GSM1024462_LTH.mock.rep2.CEL	LTH mock rep2	Control	-1			GSE29967	GSM741688_TN1_T24-2.CEL	TN1 stem at T24, biological rep2	Stress	1
		GSE33204	GSM822101	HH1-LT, biological replicate 2	Stress	1			GSE26280	GSM645345	Drought treated roots at panicle elongation stage, biological rep3	Stress	1			GSE41798	GSM1024463_LTH.mock.rep3.CEL	LTH mock rep3	Control	-1			GSE29967	GSM741689_TN1_T24-3.CEL	TN1 stem at T24, biological rep3	Stress	1
		GSE33204	GSM822102	HH1-LT, biological replicate 3	Stress	1			GSE21651	GSM540084	Tolerant-drought-control-A	Control	-1			GSE7256	GSM174883.CEL	A mock 3 rep 1 with array type rice from Affymetrix	Control	-1
		GSE33204	GSM822103	MH63-LT, biological replicate 1	Stress	1			GSE21651	GSM540085	Tolerant-drought-control-B	Control	-1			GSE7257	GSM174884.CEL	E mock 4 rep 1 with array type rice from Affymetrix	Control	-1
		GSE33204	GSM822104	MH63-LT, biological replicate 2	Stress	1			GSE21651	GSM540086	Tolerant-drought strA	Stress	1			GSE7258	GSM174885.CEL	B FR13 3 rep 1 with array type rice from Affymetrix	Stress	1
		GSE33204	GSM822105	MH63-LT, biological replicate 3	Stress	1			GSE21651	GSM540087	Tolerant-drought str-B	Stress	1			GSE7259	GSM174886.CEL	F FR13 4 rep 1 with array type rice from Affymetrix	Stress	1
		GSE6901	GSM159259	7-day-old Seedling, biological rep 1	Control	-1			GSE23211	GSM570988	Rice_wt-well-watered-1	Control	-1			GSE7260	GSM174887.CEL	D FR13 3 rep 2 with array type rice from Affymetrix	Stress	1
		GSE6901	GSM159260	7-day-old Seedling, biological rep 2	Control	-1			GSE23211	GSM570989	Rice_wt-well-watered-2	Control	-1			GSE7261	GSM174888.CEL	C mock 3 rep 2 with array type rice from Affymetrix	Control	-1
		GSE6901	GSM159261	7-day-old Seedling, biological rep 3	Control	-1			GSE23211	GSM570990	Rice_wt-well-watered-3	Control	-1			GSE7262	GSM174889.CEL	H FR13 4 rep 2 with array type rice from Affymetrix	Stress	1
		GSE6901	GSM159268	Cold stress, biological rep 1	Stress	1			GSE23211	GSM570991	Rice_5T-well-watered-4	Control	-1			GSE7263	GSM174890.CEL	G mock 4 rep 2 with array type rice from Affymetrix	Control	-1
		GSE6901	GSM159269	Cold stress, biological rep 2	Stress	1			GSE23211	GSM570992	Rice_5T-well-watered-5	Control	-1
		GSE6901	GSM159270	Cold stress, biological rep 3	Stress	1			GSE23211	GSM570993	Rice_5T-well-watered-6	Control	-1
									GSE23211	GSM570994	Rice_wt-water-stress-7	Stress	1
									GSE23211	GSM570995	Rice_wt-water-stress-8	Stress	1
									GSE23211	GSM570996	Rice_wt-water-stress-9	Stress	1
									GSE23211	GSM570997	Rice_5T-water-stress-10	Stress	1
									GSE23211	GSM570998	Rice_5T-water-stress-11	Stress	1
									GSE23211	GSM570999	Rice_5T-water-stress-12	Stress	1
									GSE24048	GSM591761	Control Azucena leaf biologial rep 1	Control	-1
									GSE24048	GSM591762	Control Azucena leaf biologial rep 2	Control	-1
									GSE24048	GSM591763	Control Azucena leaf biologial rep 3	Control	-1
									GSE24048	GSM591764	Control Bala leaf biologial rep 1	Control	-1
									GSE24048	GSM591765	Control Bala leaf biologial rep 2	Control	-1
									GSE24048	GSM591766	Control Bala leaf biologial rep 3	Control	-1
									GSE24048	GSM591767	Droughted Azucena leaf biologial rep 1	Stress	1
									GSE24048	GSM591768	Droughted Azucena leaf biologial rep 2	Stress	1
									GSE24048	GSM591769	Droughted Azucena leaf biologial rep 3	Stress	1
									GSE24048	GSM591770	Droughted Bala leaf biologial rep 1	Stress	1
									GSE24048	GSM591771	Droughted Bala leaf biologial rep 2	Stress	1
									GSE24048	GSM591772	Droughted Bala leaf biologial rep 3	Stress	1
									GSE26280	GSM645322	normal leaves at tillering stage, biological rep1	Control	-1
									GSE26280	GSM645323	normal leaves at tillering stage, biological rep2	Control	-1
									GSE26280	GSM645324	normal leaves at tillering stage, biological rep3	Control	-1
									GSE26280	GSM645325	Drought treated leaves at tillering stage, biological rep1	Stress	1
									GSE26280	GSM645326	Drought treated leaves at tillering stage, biological rep2	Stress	1
									GSE26280	GSM645327	Drought treated leaves at tillering stage, biological rep3	Stress	1
									GSE26280	GSM645334	normal leaves at panicle elongation stage, biological rep1	Control	-1
									GSE26280	GSM645335	normal leaves at panicle elongation stage, biological rep2	Control	-1
									GSE26280	GSM645336	normal leaves at panicle elongation stage, biological rep3	Control	-1
									GSE26280	GSM645337	Drought treated leaves at panicle elongation stage, biological rep1	Stress	1
									GSE26280	GSM645338	Drought treated leaves at panicle elongation stage, biological rep2	Stress	1
									GSE26280	GSM645339	Drought treated leaves at panicle elongation stage, biological rep3	Stress	1
									GSE26280	GSM645346	normal leaves at booting stage, biological rep1	Control	-1
									GSE26280	GSM645347	normal leaves at booting stage, biological rep2	Control	-1
									GSE26280	GSM645348	normal leaves at booting stage, biological rep3	Control	-1
									GSE26280	GSM645349	Drought treated leaves at booting stage, biological rep1	Stress	1
									GSE26280	GSM645350	Drought treated leaves at booting stage, biological rep2	Stress	1
									GSE26280	GSM645351	Drought treated leaves at booting stage, biological rep3	Stress	1
									GSE26280	GSM645352	normal young panicle at booting stage, biological rep1	Control	-1
									GSE26280	GSM645353	normal young panicle at booting stage, biological rep2	Control	-1
									GSE26280	GSM645354	normal young panicle at booting stage, biological rep3	Control	-1
									GSE26280	GSM645355	Drought treated young panicle at booting stage, biological rep1	Stress	1
									GSE26280	GSM645356	Drought treated young panicle at booting stage, biological rep2	Stress	1
									GSE26280	GSM645357	Drought treated young panicle at booting stage, biological rep3	Stress	1
